# Supplementary material for: Discrepancy between Knowledge and Perceptions of Dietary Omega-3 Fatty Acid Intake Compared with the Omega-3 Index
Source: MDPI journal article supplement (doi:10.3390/nu9090930), 2017-08-24
Supplement: s1 [file s1]

**Supplemental Table S1.** Proportion (%) of adults reporting on the importance of improving or maintaining various dimensions of health in the United States and Germany <sup>1</sup>

|                      | Not important,<br>n (%) | Somewhat important<br>n (%) | Important<br>n (%) | Very important<br>n (%) |
|----------------------|-------------------------|-----------------------------|--------------------|-------------------------|
| <b>United States</b> |                         |                             |                    |                         |
| Health area          |                         |                             |                    |                         |
| Overall wellness     | -                       | 5 (5)                       | 20 (20)            | 75 (75)                 |
| Brain Health         | -                       | 3 (3)                       | 21 (21)            | 76 (76)                 |
| Heart health         | -                       | 3 (3)                       | 27 (27)            | 70 (70)                 |
| Immunity             | -                       | 13 (13)                     | 31 (31)            | 56 (56)                 |
| Mood                 | -                       | 13 (13)                     | 34 (34)            | 53 (53)                 |
| Vision               | -                       | 14 (14)                     | 36 (36)            | 48 (48)                 |
| Digestion            | 1 (1)                   | 17 (17)                     | 39 (39)            | 43 (43)                 |
| Bone health          | 2 (2)                   | 13 (13)                     | 44 (44)            | 41 (41)                 |
| Alzheimer's          | 8 (8)                   | 19 (19)                     | 26 (26)            | 34 (34)                 |
| <b>Germany</b>       |                         |                             |                    |                         |
| Health area          |                         |                             |                    |                         |
| Overall wellness     | 4 (4)                   | 7 (7)                       | 33 (33)            | 54 (54)                 |
| Brain Health         | 4 (4)                   | 8 (8)                       | 35 (35)            | 48 (48)                 |
| Heart health         | 2 (2)                   | 6 (6)                       | 34 (34)            | 55 (55)                 |
| Immunity             | 3 (3)                   | 8 (8)                       | 29 (29)            | 58 (58)                 |
| Mood                 | 5 (5)                   | 19 (19)                     | 31 (31)            | 42 (42)                 |
| Vision               | 7 (7)                   | 19 (19)                     | 41 (41)            | 25 (25)                 |
| Digestion            | 7 (7)                   | 6 (6)                       | 41 (41)            | 42 (42)                 |
| Bone health          | -                       | 8 (8)                       | 47 (47)            | 41 (41)                 |
| Alzheimer's          | 6 (6)                   | 14 (14)                     | 46 (46)            | 21 (21)                 |

<sup>1</sup>Percentages may not add up to 100, since data for categories 'Refused' and 'Don't know' are not shown

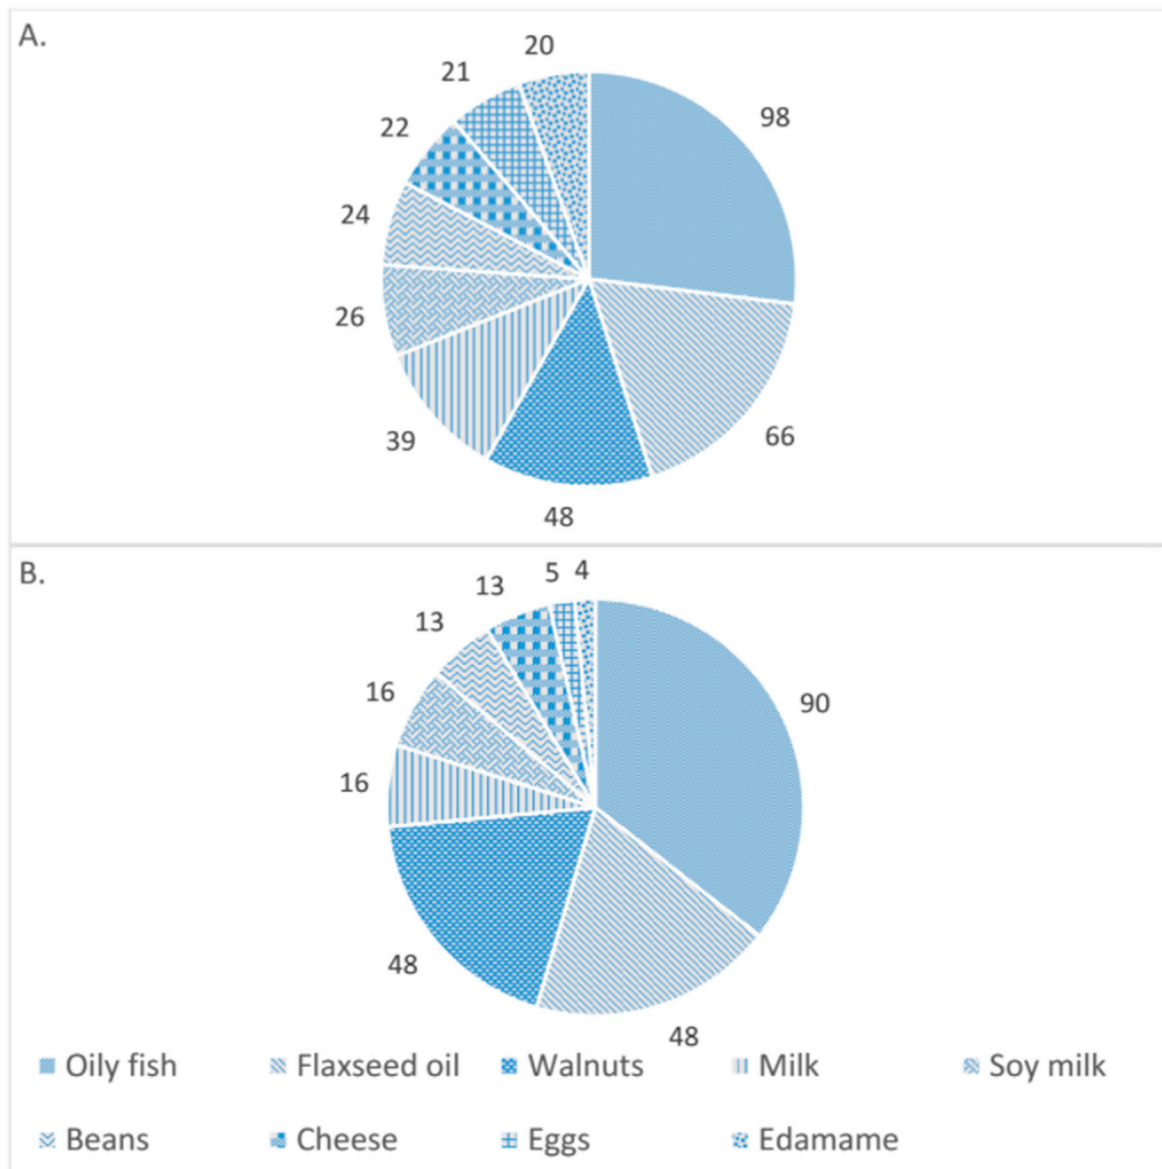

**Supplemental Figure S1.** Proportion of participants identifying food sources of omega-3 fatty acids in the United States (Panel A) and Germany (Panel B).
